# Supplementary material for: Policy responses to the COVID-19 pandemic in West Africa: a scoping review protocol
Source: HighWire-hosted journal article supplement (doi:10.1136/bmjopen-2023-079810), 2023-12-01
Supplement: bmjopen-2023-079810supp001_data_supplement.pdf [file bmjopen-2023-079810supp001_data_supplement.pdf]

## Appendices

### Appendix I: Search strategy

| Database | Search string                                                                                                                                                                                                                                                                                                                                                                                                                                                                                                                                                                                                                                                                                                                                                                                                                                                                                                                                                                                                                                                                                                                                                                                                                                                                                                                     |
|----------|-----------------------------------------------------------------------------------------------------------------------------------------------------------------------------------------------------------------------------------------------------------------------------------------------------------------------------------------------------------------------------------------------------------------------------------------------------------------------------------------------------------------------------------------------------------------------------------------------------------------------------------------------------------------------------------------------------------------------------------------------------------------------------------------------------------------------------------------------------------------------------------------------------------------------------------------------------------------------------------------------------------------------------------------------------------------------------------------------------------------------------------------------------------------------------------------------------------------------------------------------------------------------------------------------------------------------------------|
| Scopus   | <p>( TITLE-ABS-KEY ( "non-pharmaceutical*" OR "nonpharmaceutical" OR "non-pharmacological" OR "nonpharmacological" OR "public health and social measures" OR "public health measures" OR "social measures" OR "containment" OR "hygiene" OR "hand hygiene" OR "face mask" OR "mask wearing" OR "mask-wearing" OR "disinfection" OR "ventilation" OR "hand-washing" OR "physical distancing" OR "social distancing" OR "closure" OR "mass gatherings" OR "shielding" OR "travel restriction" OR "travel ban" OR "movement restriction" OR "border closure" OR "RCCE" OR "community engagement" OR "active case detection" OR "screening" OR "contact tracing" OR "isolation" OR "quarantine" OR "curfew" OR "compliance" OR "adherence" OR "school closure" OR "business closure" OR "workplace closure" ) AND TITLE-ABS-KEY ( "infectious" OR "communicable" OR "epidemic" OR "pandemic" OR "outbreak" OR "coronavirus" OR "SARS-CoV-2" OR "COVID" ) AND TITLE-ABS-KEY ( "West Africa" OR "Sierra Leone" OR "Guinea" OR "Ghana" OR "Benin" OR "Burkina Faso" OR "Cabo Verde" OR "Cote d'Ivoire" OR "Ivory Coast" OR "Gambia" OR "Guinea-Bissau" OR "Liberia" OR "Mali" OR "Nigeria" OR "Niger" OR "Senegal" OR "Togo" ) ) AND PUBYEAR &gt; 2019 AND ( LIMIT-TO ( LANGUAGE , "English" ) OR LIMIT-TO ( LANGUAGE , "French" ) )</p> |
